# Supplementary material
Source: PubMed Central journal article supplement (PMC7158946)
Supplement: mmc1.pdf [file mmc1.pdf]

# THE LANCET

## Haematology

### Supplementary appendix

This appendix formed part of the original submission and has been peer reviewed. We post it as supplied by the authors.

Supplement to: Wang T, Chen R, Liu C, et al. Attention should be paid to venous thromboembolism prophylaxis in the management of COVID-19. *Lancet Haematol* 2020; published online April 9. [https://doi.org/10.1016/S2352-3026\(20\)30109-5](https://doi.org/10.1016/S2352-3026(20)30109-5).

**Supplemental Table 1.** Laboratory findings of COVID-19 with high and low VTE risk

| Thrombus assessment/laboratory results    |       | Padua Score <4     | Padua Score $\geq$ 4 | OR (95%CI) *     | P value* |
|-------------------------------------------|-------|--------------------|----------------------|------------------|----------|
| Prothrombin time (s)                      |       | 12.0(11.0-13.0)    | 12.0(11.0-13.0)      |                  |          |
| No.#/total No. (%)                        | >13.5 | 51/349(14.6%)      | 44/286(15.4%)        | 1.10 (0.69-1.77) | 0.688    |
| Activated partial thromboplastin time (s) |       | 32.0(28.0-36.0)    | 30.0(25.0-34.0)      |                  |          |
| No. #/total No. (%)                       | >37   | 74/345(21.4%)      | 45/277(16.2%)        | 0.81 (0.52-1.27) | 0.364    |
| Platelet count(*10 <sup>9</sup> /L)       |       | 169.0(134.0-206.0) | 167.0(126.0-211.3)   |                  |          |
| No. #/total No. (%)                       | <100  | 22/477(4.6%)       | 35/350(10.0%)        | 0.55 (0.31-1.00) | 0.050    |
| Aspartate aminotransferase (U/l)          |       | 25(20.3-34.0)      | 31.0(23.0-42.0)      |                  |          |
| No. #/total No. (%)                       | >40   | 74/414(17.9%)      | 90/313(28.8%)        | 1.63 (1.10-2.40) | 0.014    |
| Alanine aminotransferase (U/l)            |       | 22.0(15.0-33.2)    | 26.0(17.1-40.9)      |                  |          |
| No. #/total No. (%)                       | >50   | 51/405(12.6%)      | 60/308(19.5%)        | 1.85 (1.18-2.89) | 0.007    |
| D-dimer (mg/l)                            |       | 0.3(0.2-0.8)       | 0.6(0.3-1.5)         |                  |          |
| No. #/total No. (%)                       | >1.5  | 43/294(14.6%)      | 58/249(23.3%)        | 1.41 (0.87-2.29) | 0.169    |
| C reactive protein (mg/l)                 |       | 10.4(3.7-24.1)     | 23.7(9.3-54.6)       |                  |          |
| No. #/total No. (%)                       | >10   | 229/444(51.6%)     | 225/315(71.4%)       | 1.78 (1.27-2.48) | 0.001    |

\* adjusted by age, # refers to the number of patients above or below the threshold stated in column 2, the threshold was selected based on the normal range of these laboratory results.
